# Supplementary material for: Nursing workload, nurse staffing methodologies and tools: A systematic scoping review and discussion
Source: PubMed Central journal article supplement (PMC7086229; doi:10.1016/j.ijnurstu.2019.103487), 2020-03
Supplement: mmc1.pdf [file mmc1.pdf]

Supplementary material - Griffiths et al Nursing workload, Nurse Staffing Methodologies Tools: a systematic scoping review discussion published in the International Journal of Nursing Studies

Table 4 recent studies included in the review

| Source / Reference                                                                                                                                                                                                                                                                                                                       | type of measure                    | Single centre?                         | Main Theme               | Key Points / findings                                                                                                                                                                                                                                                           |
|------------------------------------------------------------------------------------------------------------------------------------------------------------------------------------------------------------------------------------------------------------------------------------------------------------------------------------------|------------------------------------|----------------------------------------|--------------------------|---------------------------------------------------------------------------------------------------------------------------------------------------------------------------------------------------------------------------------------------------------------------------------|
| Beswick, S., et al. (2010). "Comparison of nurse workload approaches." <u>Journal of Nursing Management</u> 18(5): 592-598.                                                                                                                                                                                                              | patient volume                     | Single (2 units)                       | Comparison               | Compared workload measures based on simple HPPD with midnight census vs intra day measures (no significant difference) vs measure including turnover (significantly increased HPPD)                                                                                             |
| Rivera, K. (2017). A Comparison of a Standardized Method of Identifying Nursing Staff Needs with Measures of Nursing Staff Needs by Patient Acuity. Ann Arbor, The William Paterson University of New Jersey. <b>10637025</b> : 58.                                                                                                      | prototype / patient volume         | Single (?)                             | Comparison               | Compared staffing requirement based on HPPD vs an acuity measure                                                                                                                                                                                                                |
| Simon, M., et al. (2011). "Midnight census revisited: Reliability of patient day measurements in US hospital units." <u>International Journal of Nursing Studies</u> 48(1): 56-61.                                                                                                                                                       | patient volume                     | Multi (54 Hospitals, 260 Units)        | Comparison               | Compared different patient count methods used in calculation hours per patient day and found that while agreement between methods was high there was some evidence of bias but midnight census did not differ substantially from the 'gold standard' (multiple census approach) |
| Fagerström, L., et al. (2014). "The RAFAELA system: a workforce planning tool for nurse staffing and human resource management: Lisbeth Fagerström and colleagues describe a method pioneered in Finnish hospitals that aims to uphold staffing levels in accordance with patients' care needs." <u>Nursing Management</u> 21(2): 30-36. | indicator / professional judgement | N/A                                    | Description              | Descriptive report which includes some example data from the use of the Rafaela system                                                                                                                                                                                          |
| Fenton, K. and A. Casey (2015). "A tool to calculate safe nurse staffing levels." <u>Nursing Times</u> 111(3): 12-14.                                                                                                                                                                                                                    | prototype                          | N/A                                    | Description              | Descriptive report on the use of the SNCT                                                                                                                                                                                                                                       |
| Hurst, K. (2008). "UK ward design: Patient dependency, nursing workload, staffing and quality--An observational study." <u>International Journal of Nursing Studies</u> 45(3): 370-381.                                                                                                                                                  | prototype                          | Multi centre (40 hospital / 375 wards) | Description              | Calculated average workload associated with various hospital ward designs using Hurst's acuity / dependency / quality measure concluding that some ward designs were associated with higher workloads than others                                                               |
| Hurst, K. (2009). Nursing and payment By Results: Understanding the Cost of Care (RCN Policy Briefing: 11/2009). London, Royal College of Nursing.                                                                                                                                                                                       | prototype                          | Multi centre (10 hospital / 40 wards)  | Description              | Calculated average nursing costs associated with various Health Resource Groups (diagnoses) using Hurst's acuity / dependency / quality measure                                                                                                                                 |
| Kolakowski, D. (2016). "Constructing a nursing budget using a patient classification system." <u>Nurs Manage</u> 47(2): 14-16.                                                                                                                                                                                                           | unspecified PCS                    | N/A                                    | Description              | Simple description of setting a budget from an unspecified patient classification system.                                                                                                                                                                                       |
| The Shelford group (2014). Safer Nursing Care Tool Implementation Resource Pack, The Shelford Group.                                                                                                                                                                                                                                     | prototype                          | N/A                                    | Description              | Manual describing the use of the SNCT. Includes a broad description of the volume of observations that underly the care multipliers that have been developed                                                                                                                    |
| Smith, S., et al. (2009). "Developing, testing and applying instruments for measuring rising dependency-acuity's impact on ward staffing and quality." <u>International Journal of Health Care Quality Assurance</u> 22(1): 30-39.                                                                                                       | prototype                          | Multi (3 hospitals)                    | Description & evaluation | Describes the use and development of the SNCT (then AUKUH) instrument including comparison with an existing dependency measure (Cronbach's alpha .99)                                                                                                                           |
| Taylor, B., et al. (2015). "Evaluating the Veterans Health Administration's Staffing Methodology Model: A Reliable Approach." <u>Nursing Economics</u> 33(1): 36-40, 66.                                                                                                                                                                 | professional judgement             | N/A                                    | Description & evaluation | Qualitative evaluation of feedback (broadly positive) on a formal professional judgement and benchmarking based staffing review approach.                                                                                                                                       |

Table 4 recent studies included in the review

| Source / Reference                                                                                                                                                                                                                              | type of measure                    | Single centre?                   | Main Theme               | Key Points / findings                                                                                                                                                                                                      |
|-------------------------------------------------------------------------------------------------------------------------------------------------------------------------------------------------------------------------------------------------|------------------------------------|----------------------------------|--------------------------|----------------------------------------------------------------------------------------------------------------------------------------------------------------------------------------------------------------------------|
| Baernholdt, M., et al. (2010). "Using clinical data to capture nurse workload: implications for staffing and safety." <u>CIN: Computers, Informatics, Nursing</u> <b>28</b> (4): 229-234.                                                       | patient volume                     | Single (whole hospital)          | Development              | Describes a measure based on routine clinical data including patient numbers, turnover (admissions and discharges)                                                                                                         |
| De Cordova, P. B., et al. (2010). "Using the nursing interventions classification as a potential measure of nurse workload." <u>Journal of Nursing Care Quality</u> <b>25</b> (1): 39.                                                          | timed task                         | N/A                              | Development              | Consensus exercise on timings associated with NIC domains / interventions                                                                                                                                                  |
| Ferguson-Paré, M. and A. Bandurichin (2010). "The Ontario nursing workload demonstration projects: Rethinking how we measure, cost and plan the work of nurses." <u>Nursing Leadership</u> <b>23</b> (Special Issue).                           | indicator                          | Multi centre (3 sites / 6 units) | Development              | Early stage work determining factors to be considered in a staffing system, including timing studies across 12 broad activity areas                                                                                        |
| Myny, D., et al. (2010). "Determination of standard times of nursing activities based on a Nursing Minimum Dataset." <u>Journal of Advanced Nursing</u> <b>66</b> (1): 92-102.                                                                  | timed task                         | Multi (18 hospitals 48 units)    | Development              | Established standard times for 102 nursing activities based on observations and self report                                                                                                                                |
| Myny, D., et al. (2012). "Determining a set of measurable and relevant factors affecting nursing workload in the acute care hospital setting: a cross-sectional study." <u>International Journal of Nursing Studies</u> <b>49</b> (4): 427-436. | timed task                         | N/A                              | Development              | Assessed a wide number of factors influencing nursing workload (other than acuity) in the context of developing a workload measure. Most important factors increasing workload are interruptions and patient turnover      |
| Hoi, S. Y., et al. (2010). "Determining nurse staffing needs: the workload intensity measurement system." <u>Journal of Nursing Management</u> <b>18</b> (1): 44-53.                                                                            | indicator                          | Single (1500 beds)               | Development & comparison | Developed an indicator system based on care times associated with a range of nursing diagnoses + associated activities & used this to identify staffing requirements compared to those from a previous (unreported) study. |
| Myny, D., et al. (2014). "Validation of standard times and influencing factors during the development of the Workload Indicator for Nursing." <u>Journal of Advanced Nursing</u> <b>70</b> (3): 674-686.                                        | timed task                         | Multi (4 hospitals 23 units)     | Development & evaluation | Reports cross validation of a measure based on a NMD with nurses direct recording of care time. Found high correlations but significant differences between time as estimated from the two measures                        |
| Perroca, M. G. (2013). "The new version of a patient classification instrument: assessment of psychometric properties." <u>Journal of Advanced Nursing</u> <b>69</b> (8): 1862-1868.                                                            | indicator                          | Single (10 Units)                | Development & evaluation | Assessed inter-rater reliability and factor structure of a multi-item PCI. Weighted Kappa showed strong agreement                                                                                                          |
| Brennan, C. W., et al. (2012). "The oncology acuity tool: a reliable, valid method for measuring patient acuity for nurse assignment decisions." <u>Journal of Nursing Measurement</u> <b>20</b> (3): 155.                                      | indicator / professional judgement | Single (1 Unit)                  | Development & evaluation | Describes the development of a multi-factor acuity measure + content validation, reliability testing and validation by measures of association with outcome and a direct nurse assessment (expert judgement) of acuity     |

Supplementary material - Griffiths et al Nursing workload, Nurse Staffing Methodologies Tools: a systematic scoping review discussion published in the International Journal of Nursing Studies

Table 4 recent studies included in the review

| Source / Reference                                                                                                                                                                                                                                                                                                                                                                                                | type of measure                                     | Single centre?                             | Main Theme                      | Key Points / findings                                                                                                                                                                                                                                                                                             |
|-------------------------------------------------------------------------------------------------------------------------------------------------------------------------------------------------------------------------------------------------------------------------------------------------------------------------------------------------------------------------------------------------------------------|-----------------------------------------------------|--------------------------------------------|---------------------------------|-------------------------------------------------------------------------------------------------------------------------------------------------------------------------------------------------------------------------------------------------------------------------------------------------------------------|
| Hurst, K., et al. (2008). "Calculating staffing requirements." <i>Nursing Management</i> 15(4): 26-34.                                                                                                                                                                                                                                                                                                            | prototype / professional judgement                  | Multi-center (3 hospital 16 'care groups') | Development & evaluation        | Describes development and validation of the AUKUH multipliers (determined by professional judgement) by rating against an existing categorisations scheme with underlying observations of time to deliver care on high quality wards                                                                              |
| Larson, E. L., et al. (2017). "Assessing Intensity of Nursing Care Needs Using Electronically Available Data." <i>Comput Inform Nurs</i> 35(12): 617-623.                                                                                                                                                                                                                                                         | indicator / professional judgement                  | Single (whole hospital)                    | Development & evaluation        | Development of a system drawing on data from electronic systems including procedures to develop an intensity index, used professional judgement of nursing care intensity as the criterion measure (showing high correlation)                                                                                     |
| Morales-Asencio, J. M., et al. (2015). "Design and validation of the INICIARE instrument, for the assessment of dependency level in acutely ill hospitalised patients." <i>Journal of Clinical Nursing</i> 24(5-6): 761-777.                                                                                                                                                                                      | indicator                                           | Multi (2 hospitals)                        | Development & evaluation        | Reports the development of an Instrument based on NOC with reports of inter item correlation and validation by correlation with the Barthel Index.                                                                                                                                                                |
| Gabbay, U. and M. Bukchin (2009). "Does daily nurse staffing match ward workload variability? Three hospitals' experiences." <i>International Journal of Health Care Quality Assurance</i> 22(6): 625-641.                                                                                                                                                                                                        | patient volume                                      | Multi centre (3 sites / 40 units)          | Development / descriptive study | Tracked workforce / workload using simple nurse to patient measures to demonstrate variability in demand and capacity. Intended as preliminary to developing workload management systems                                                                                                                          |
| Brennan, C. W. and B. J. Daly (2015). "Methodological challenges of validating a clinical decision-making tool in the practice environment." <i>Western Journal of Nursing Research</i> 37(4): 536-545.                                                                                                                                                                                                           | indicator                                           | Single (1 Unit)                            | Evaluation                      | Reports on 'methodological challenges' encountered in developing a new tool but content is largely based on perspectives of potential end users on aspects of the tool including necessary content.                                                                                                               |
| Fagerstrom, L., et al. (2018). "Nursing workload, patient safety incidents and mortality: an observational study from Finland." <i>BMJ Open</i> 8(4): e016367.                                                                                                                                                                                                                                                    | indicator / patient volume / professional judgement | Multi -centre (4 hospitals / 36 units)     | Evaluation                      | Looked at association between OPC per nurse (Rafaela system) and safety incidents. Showed odds of patient safety incident was increased when staffing was below optimal. However it was decreased by staff above optimal however effect sizes and model fit were only marginally better than patient/nurse ratios |
| Twigg, et al., 2013. The economic benefits of increased levels of nursing care in the hospital setting. <i>J Adv Nurs</i> 69 (10), 2253-2261.                                                                                                                                                                                                                                                                     | patient volume                                      | Multi (3 hospitals)                        | Evaluation                      | Before and after study of implementation of NHPPD method to determine nurse staffing in W. Australian Hospitals. Implementation of staffing according to the system was associated with an increase in staff and judged to be cost effective (low cost per life saved) see Twigg et al 2011                       |
| Twigg, D., et al. (2011). "The impact of the nursing hours per patient day (NHPPD) staffing method on patient outcomes: a retrospective analysis of patient and staffing data." <i>International Journal of Nursing Studies</i> 48(5): 540-548                                                                                                                                                                    | patient volume                                      | Multi (3 hospitals)                        | Evaluation                      | Before and after study of implementation of NHPPD method to determine nurse staffing in W. Australian Hospitals. Implementation of staffing according to the system was associated with an increase in staff and reduced mortality. see Twigg et al 2011                                                          |
| van Oostveen, C. J., et al. (2016). "Pre-implementation studies of a workforce planning tool for nurse staffing and human resource management in university hospitals." <i>Journal of Nursing Management</i> 24(2): 184-191.                                                                                                                                                                                      | indicator / professional judgement                  | Multi (2 hospitals 12 wards)               | Evaluation                      | Implementation study of the Rafaela system found low agreement (absolute) on OPCS measures in some settings and poor completion of the PAONCIL instrument required to determine optimal intensity. Nurses evaluations were mixed                                                                                  |
| Griffiths, P., Ball, J., Bloor, K., Böhning, D., Briggs, J., Dall'Ora, C., Longh, A.D., Jones, J., Kovacs, C., Maruotti, A., Meredith, P., Prytherch, D., Saucedo, A.R., Redfern, O., Schmidt, P., Sinden, N., Smith, G., 2018. Nurse staffing levels, missed vital signs and mortality in hospitals: retrospective longitudinal observational study. <i>Health Services and Delivery Research Journal</i> 6, 38. | prototype                                           | Single (32 units)                          | Evaluation                      | When RN staffing fell below the planned level, determined through periodic review using the SNCT (prototype system) mortality was increased. High patient turnover relative to unit mean was also associated with significantly increased mortality                                                               |

Supplementary material - Griffiths et al Nursing workload, Nurse Staffing Methodologies Tools: a systematic scoping review discussion published in the International Journal of Nursing Studies

Table 4 recent studies included in the review

| Source / Reference                                                                                                                                                                                                                           | type of measure                    | Single centre?                       | Main Theme                 | Key Points / findings                                                                                                                                                                                                                                             |
|----------------------------------------------------------------------------------------------------------------------------------------------------------------------------------------------------------------------------------------------|------------------------------------|--------------------------------------|----------------------------|-------------------------------------------------------------------------------------------------------------------------------------------------------------------------------------------------------------------------------------------------------------------|
| Junttila, J. K., et al. (2016). "Hospital mortality and optimality of nursing workload: A study on the predictive validity of the RAFAELA Nursing Intensity and Staffing system." <i>International Journal of Nursing Studies</i> 60: 46-53. | indicator / professional judgement | Multi centre (2 hospital / 34 units) | Evaluation                 | Looked at association between OPC per nurse (Rafaela system) and mortality. Showed odds death were increased when staffing was below optimal. However it was decreased by staffing above optimal                                                                  |
| Liljamo, P., et al. (2017). "Quality of nursing intensity data: inter-rater reliability of the patient classification after two decades in clinical use." <i>Journal of Advanced Nursing</i> 73(9): 2248-2259.                               | indicator                          | Single (32 units)                    | Evaluation                 | Inter-rater reliability using OPC (Rafaela system) showing moderate agreement on overall OPC category although weighted kappa shows strong agreement. Some sub scales show fair agreement only but again generally weighted kappas indicate substantial agreement |
| Needleman, J., et al. (2011). "Nurse staffing and inpatient hospital mortality." <i>New England Journal of Medicine</i> 364(11): 1037-1045.                                                                                                  | unspecified PCS                    | Single (43 Units)                    | Evaluation                 | When staffing fell below the target set by a PCS mortality was increased. High patient turnover relative to unit mean was also associated with significantly increased mortality                                                                                  |
| Davis, A., et al. (2014). "Nurse Staffing under Demand Uncertainty to Reduce Costs and Enhance Patient Safety." <i>Asia-Pacific Journal of Operational Research</i> 31(01): 1450005.                                                         | patient volume                     | Multi (2 units / 2 hospitals)        | Operational Research Model | Calculated optimal staffing in the face of variable demand (patient census based only) using a newsvendor model and calculated cost savings (relative to mean) associated with overstaffing according to the model for general.                                   |
| Harper, P. R., et al. (2017). "Modelling the size and skill-mix of hospital nursing teams." <i>Journal of the Operational Research Society</i> 61(5): 768-779.                                                                               | prototype/ patient volume          | Single (6 units)                     | Operational Research Model | Calculated optimal staffing in the face of variable demand (patient census and acuity / dependency based measures "informed" by Hurst's work) and estimated required WTE equivalent staff as higher, compared to current (average) based approaches               |
| Kortbeek, N., et al. (2015). "Flexible nurse staffing based on hourly bed census predictions." <i>International Journal of Production Economics</i> 161(167-180): 167-180.                                                                   | patient volume                     | Single (4 units)                     | Operational Research Model | Compares staffing required based on a predictive tool based on patient census compared to a full (nurses to bed) model & finds that census based models require fewer staff with mixed findings on the use of a flexible staffing pool                            |
| Maenhout, B. and M. Vanhoucke (2013). "An integrated nurse staffing and scheduling analysis for longer-term nursing staff allocation problems." <i>Omega</i> 41(2): 485-499.                                                                 | patient volume                     | N/A                                  | Operational Research Model | Models different approaches to staffing with varying compositions of ft/ pt / float unit staff based on an unclear workload / demand model, presumed to be a fixed nurse to bed measure. Variations considered appear to be primarily supply                      |
